# Supplementary material for: Non-Lytic, Actin-Based Exit of Intracellular Parasites from C. elegans Intestinal Cells
Source: PLoS Pathog. 2011 Sep 15;7(9):e1002227. doi: 10.1371/journal.ppat.1002227 (PMC3174248; doi:10.1371/journal.ppat.1002227)
Supplement: Table S2 — Analysis of IFB-2::CFP terminal web gap number and size in a population of animals. (XLS) [file ppat.1002227.s005.xls]

## Sheet: Sheet1
Table S2. Analysis of IFB-2::CFP terminal web gap number and size in a population of animals
Quantitation of gap number. These data contributed to plot in Figure 5B
40hpi					62-64hpi
Worm #	Total quadrant size analyzed (μm2)	# gaps	# gaps/μm2		Worm #	Total quadrant size analyzed (μm2)	# gaps	# gaps/μm2
1	137.3	15	0.10925		11	198.3	17	0.0857287
2	187.4	14	0.0747065		12	157.8	22	0.139417
3	141.9	28	0.197322		13	163.2	20	0.122549
4	119.6	18	0.150502		14	191.8	27	0.140772
5	140.2	28	0.199715		15	154.6	35	0.226391
6	82.9	17	0.205066		16	344.5	33	0.095791
7	151.6	20	0.131926		17	115.4	28	0.242634
8	159.3	34	0.213434		18	197.5	31	0.156962
9	170.1	39	0.229277		19	162.4	29	0.178571
10	92.4	35	0.378788		20	254.8	30	0.117739
Quantitation of gap size, with several gaps counted per worm. These data contributed to plot in Figure 5C
40hpi					62-64hpi
Worm #	Quadrant area analyzed for gap size measurements (μm2)	Gap size (μm2)			Worm #	Quadrant area analyzed for gap size measurements (μm2)	Gap size (μm2)
1	34.32	0.79			11	49.57	11.8
		0.48					2.94
		0.79					1.16
		0.13					2.46
2	46.85	1.31					2.14
		4.23			12	39.45	6.52
		1.12					1.77
		1.06					0.32
		1.72					0.7
3	35.47	2.09					5.96
		0.36			13	40.8	4.17
		0.3					3.95
		0.94					1.98
		0.28					1.35
		0.17					2.43
		0.65					1.48
4	29.9	0.17					0.71
		2.18			14	47.95	3.1
		0.33					1.03
		0.44					2.98
		0.17					4.41
		0.98					3.68
		2.1			15	38.65	2.73
5	35.05	0.55					0.71
		0.11					2.17
		0.21					0.16
		0.55					0.28
		0.49					0.34
		0.71					1.16
		0.38					4.38
		0.17			16	86.12	6.46
		0.2					3
		0.15					10.09
6	20.7	0.85					0.85
		1.47					2.38
		1.37					4.17
		0.67					0.58
7	37.9	4.65					2.67
		1.19					1.04
		0.83					0.67
		0.3					1.39
8	39.8	1.15					6.21
		0.37					7.83
		0.45					3.88
		0.62					5.18
		0.33					1.65
		0.65			17	28.85	1.43
		0.44					1.02
		0.25					0.45
		0.36					0.88
9	42.5	1.02					0.44
		0.94					0.48
		0.63					2.03
		0.88					2.67
		1.48					0.55
		0.41			18	49.37	7.05
10	23.1	1.39					4.58
		0.41					1.11
		0.25					0.67
		0.33					11.11
		0.66					5.59
		0.7			19	40.6	0.87
		0.29					2.73
		0.61					1.51
							0.59
							1.73
							1.99
							2.77
					20	63.7	4.49
							4.46
							0.55
							10.52
							3.5
							4.19
